# Supplementary material for: How useful are gridded water resources reanalysis and evapotranspiration products for assessing water security in ungauged basins?
Source: Copernicus journal article supplement (doi:10.5194/hess-2022-185), 2022-05-20

**Supplement:** Absolute uncertainty in monthly precipitation, discharge, TWSC and basin-wide water balance evapotranspiration

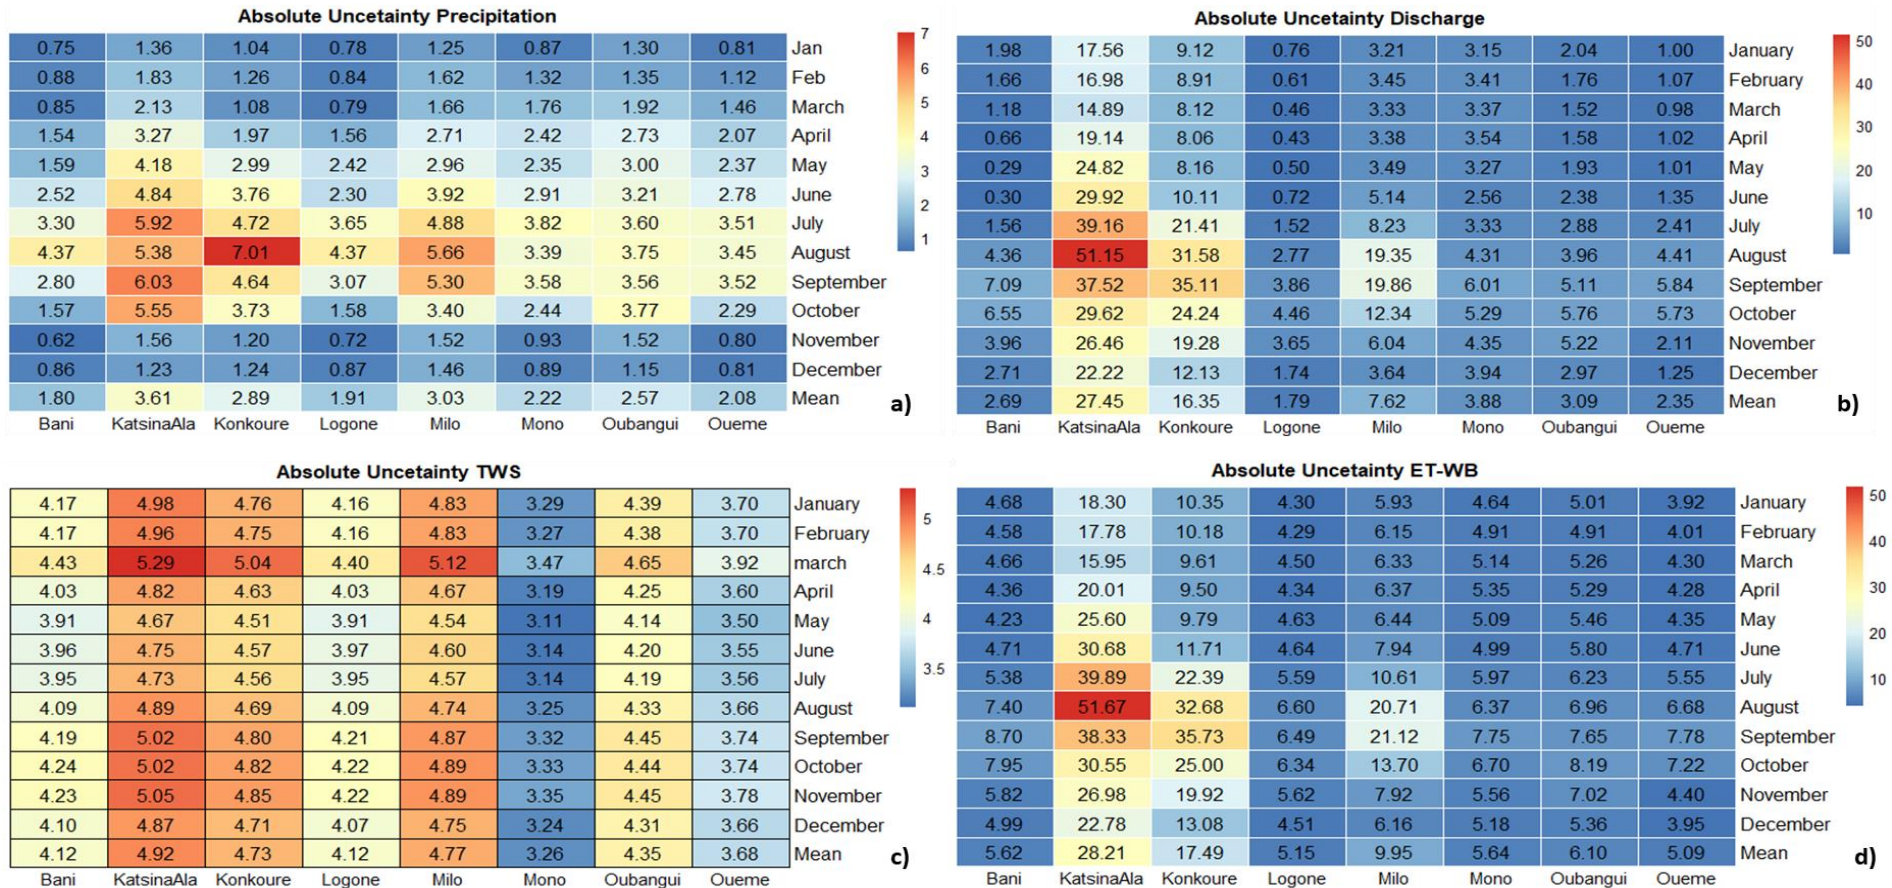

Supplement: Supplementary file 1 [file hess-2022-185-supplement.pdf]
