# Supplementary material for: How useful are gridded water resources reanalysis and evapotranspiration products for assessing water security in ungauged basins?
Source: Copernicus journal article supplement (doi:10.5194/hess-2022-185), 2022-05-20

## Supplementary 1: Precipitation Estimates from CHIRPS, GPM, PERSIANN-CDR, and their ensemble mean used in the study

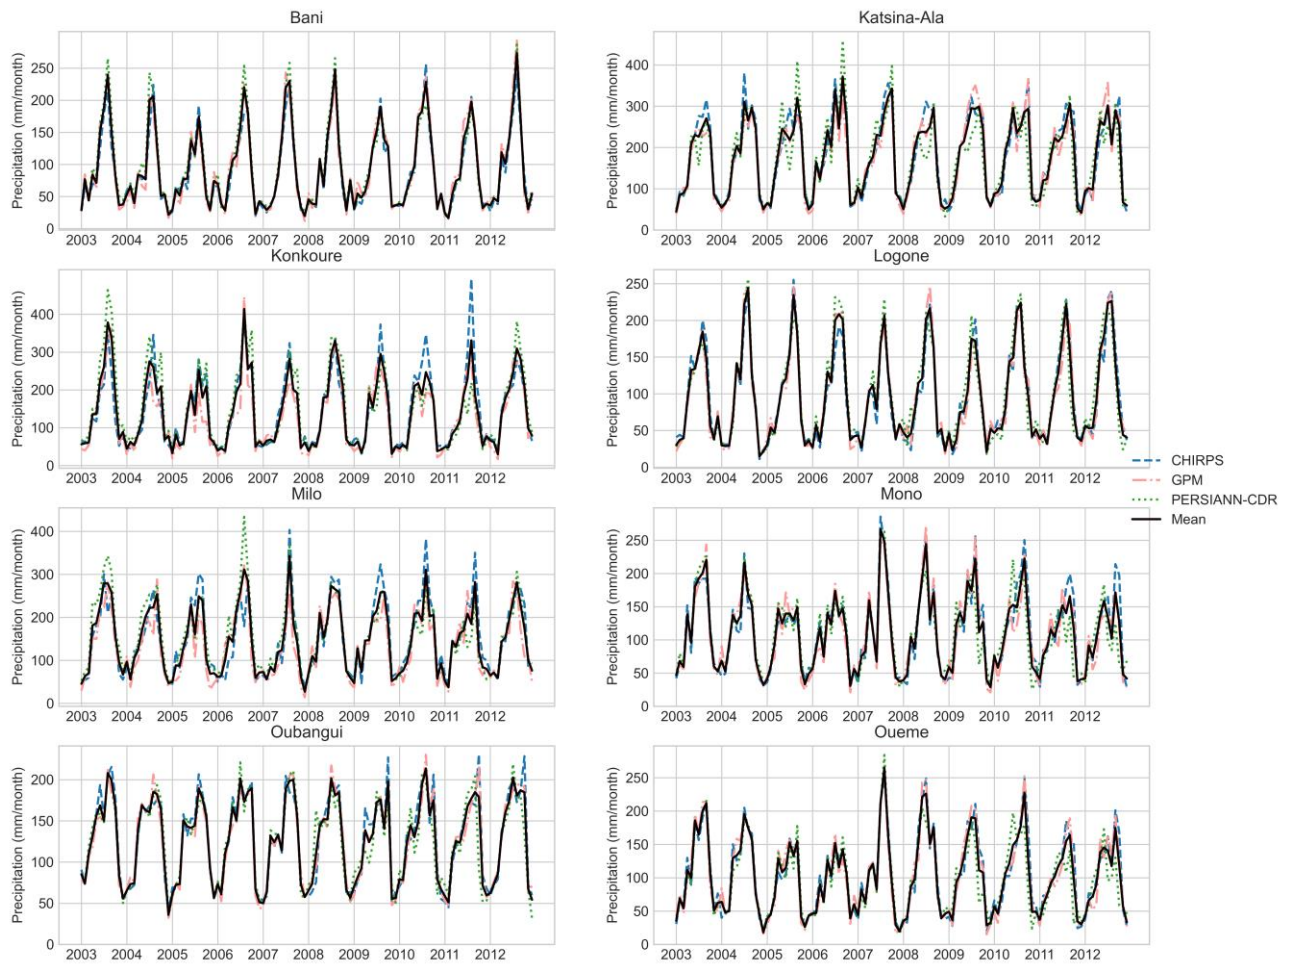

**Supplementary 2: GRACE estimates from CSR, JPL, GSFC and their ensemble mean used in the study**

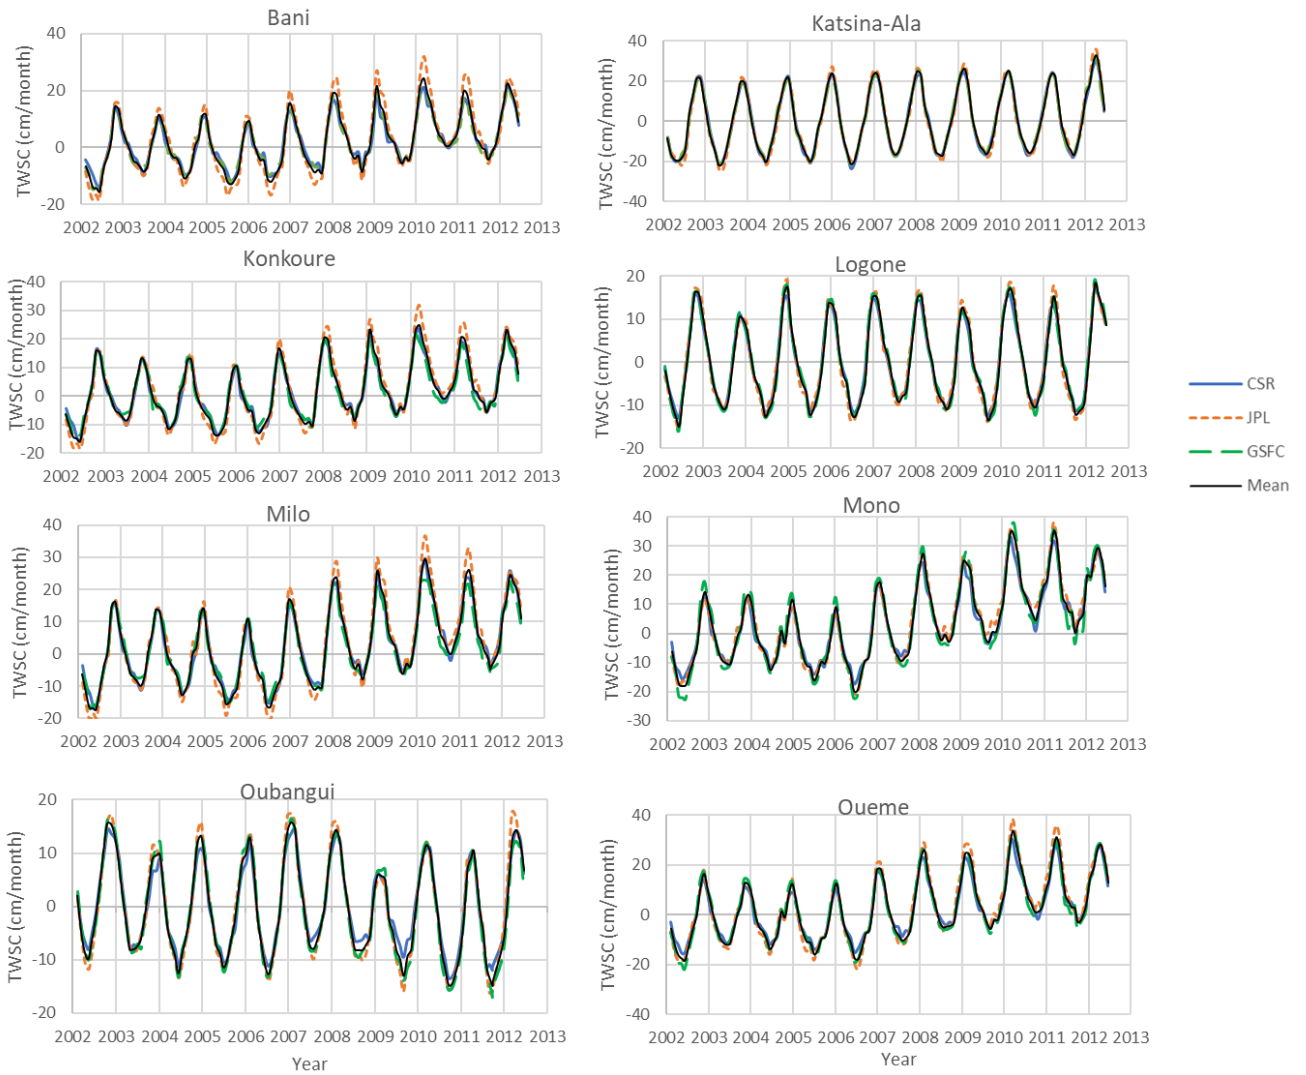

Supplement: Supplementary file [file hess-2022-185-AC10-supplement.pdf]
